1        **Intralaboratory evaluation of luminescence based high-throughput**  
2        **Serum Bactericidal Assay (L-SBA) to determine bactericidal activity of**  
3        **human sera against *Shigella***

4        **O. Rossi<sup>1</sup>, E. Molesti<sup>1</sup>, A. Saul<sup>1</sup>, C. Giannelli<sup>1</sup>, F. Micoli<sup>1</sup>, F. Necchi<sup>1\*</sup>**

5        <sup>1</sup> GSK Vaccines Institute for Global Health s.r.l (GVGH), Siena, 53100, Italy

6  
7        \* **Corresponding author:** Dr Francesca Necchi, GSK Vaccines Institute for Global Health, Via  
8        Fiorentina 1, 53100, Siena (Italy). Tel: +39 0577 243846. e-mail: [francesca.x.necchi@gsk.com](mailto:francesca.x.necchi@gsk.com)

9  
10  
11        **Running title:** characterisation L-SBA on human sera

12  
13        **Key words:** *Shigella*, GMMA, vaccine, Serum Bactericidal Assay (SBA), human, luminescence,  
14        functional assay

15

16

17 **ABSTRACT**

18 Despite the huge decrease in deaths caused by *Shigella* worldwide in the last decades, shigellosis is  
19 still causing over 200,000 deaths every year. No vaccine is currently available, and the morbidity of  
20 disease coupled with the rise of antimicrobial resistance renders the introduction of an effective  
21 vaccine extremely urgent. Although a clear immune correlate of protection against shigellosis has not  
22 been established yet, the demonstration of bactericidal activity of antibodies induced upon  
23 vaccination may provide one means of functionality of antibodies induced on protecting against  
24 *Shigella*. The method of choice to evaluate the complement-mediated functional activity of vaccine-  
25 induced antibodies is the Serum Bactericidal Assay (SBA).

26 Here we present the development and intra-laboratory characterisation of a high-throughput  
27 luminescence-based SBA (L-SBA) method, based on the detection of ATP as a proxy of surviving  
28 bacteria, to evaluate the complement-mediated killing of human sera. We demonstrated the high  
29 specificity of the assay against homologous strain without any heterologous aspecificity detected  
30 against species-related and not species-related strains. We assessed linearity, repeatability and  
31 reproducibility of L-SBA on human sera.

32 This work will guide the bactericidal activity assessment of clinical sera raised against *S. sonnei*. The  
33 method has the potential of being applicable with similar performances to determine bactericidal  
34 activity of any non-clinical and clinical sera that rely on complement mediated killing.

35

36 **IMPORTANCE**

37 *Shigella* is an important cause of diarrhoea worldwide and antimicrobial resistance is on rise, thus  
38 efforts by several groups are ongoing to produce a safe and effective vaccine against shigellosis.  
39 Although a clear immune correlate of protection has not been established, demonstration of  
40 bactericidal capacity of sera from patients immunised with *Shigella* vaccines may provide one means

41 of protecting against shigellosis. We have developed and fully characterised a novel high-throughput  
42 L- SBA method for evaluation of functionality of antibodies raised against *S. sonnei* in human sera.  
43 This work will allow the clinical testing of human sera raised against GMMA-based and potentially  
44 all vaccines producing antibodies than can work *via* complement mediated manner.

45

46

## 47 INTRODUCTION

48

49 Diarrheal diseases, such as shigelloses and salmonelloses, are the second leading cause of death  
50 worldwide, resulting in millions of deaths per year, mostly in developing countries (1). *Shigella* is  
51 major cause of sustained endemic bacterial diarrhoea, especially in low and middle-income countries  
52 where accessibility to clean water is restricted. Although the improvement of hygienic conditions in  
53 the last decade has dramatically reduced the burden of the disease, *Shigella* is still responsible for  
54 more than 200,000 deaths, with a third of them being in young children (1). On top of deaths in  
55 endemic countries, enteric diseases are causing diarrhoea to travellers and militaries in developed  
56 countries, further increasing the burden and the economic and social impact of them. Therefore, the  
57 huge morbidity and mortality of the disease coupled with the rise of antimicrobial resistance (2)  
58 render the introduction of a vaccine a priority for public health. Although several approaches have  
59 been tried during the years by several groups worldwide, no vaccines are licensed yet. Among the  
60 different approaches used to produce *Shigella* vaccines, many of the candidate vaccines target the  
61 serotype-specific O-Antigen (OAg) part of the lipopolysaccharide (LPS), as OAg has been identified  
62 as a key antigen recognized by the immune system after natural infection (3). In fact, although  
63 multiple immune mechanisms may provide protection against *Shigella* and are not yet fully  
64 elucidated, it is well established that antibodies directed to OAg can fix complement and kill target  
65 bacteria in a serotype-specific manner (3, 4). Genus *Shigella* is composed by four subgroups (*S.*

characterisation L-SBA on human sera

66 *flexneri*, *S. sonnei*, *S. dysenteriae*, and *S. boydii*) and each of them, with the exception of *S. sonnei*, is  
67 composed by different serotypes, for a total of over 50 different serotypes based on the structure of  
68 the OAg, with relative prevalence of serotypes changing geographically and over time (5). As LPS  
69 antibody production can confer protection from homologous serotypes, a multivalent *Shigella*  
70 vaccine is necessary to induce antibodies to LPS OAg from multiple serotypes in order to confer  
71 broad protection.

72 Several approaches are currently in development to deliver the O-antigen to the immune system,  
73 including whole cell attenuated bacteria (6), vaccines in which the O-antigen are chemically- (7) or  
74 bio-conjugated to carrier proteins (8), synthetic vaccine conjugates (9), and GMMA based vaccines  
75 (10). GMMA are outer membrane exosomes from Gram-negative bacteria, genetically modified to  
76 induce hyperblebbing and to reduce the reactogenic potential of lipid A (11, 12). GMMA are easy  
77 and inexpensive to produce, and highly immunogenic (10, 13-16). The most advanced GMMA based  
78 vaccine, 1790GAHB (10) has been tested in phase I and IIa clinical trials, conducted in European  
79 (17) and endemic sites (18), and has been demonstrated to be well tolerated, immunogenic, and able  
80 to induce a strong anamnestic response after boosting (19).

81 On top of vaccine immunogenicity, traditionally assessed through measurement of serum antibodies  
82 *via* antigen specific ELISA, also the functionality of antibodies raised needs to be documented.  
83 Although no correlate of protection has been yet established for *Shigella*, different approaches to  
84 assess functionality of antibodies as immunological endpoint against *Shigella* have been evaluated  
85 and have been recently reviewed (20). Among them, the serum bactericidal assay (SBA) constitutes  
86 the method of choice to measure complement-mediated bacterial killing. SBA has been accepted as  
87 an *in vitro* correlate of protection for the evaluation of immunogenicity of other bacterial vaccines,  
88 such as cholera (21) and meningococcal disease (22).

89 The working principle of SBA relies on reconstituting *in vitro* conditions in which antibodies  
90 recognize antigen on the surface of target bacterium and bind to exogenous complement, activate the

characterisation L-SBA on human sera

91 classical pathway, thus resulting in bacteriolysis and death of the target organism. The major problem  
92 with traditional SBA is that it relies on plating and counting the target bacteria. Therefore,  
93 conventional SBA has been often considered time-consuming and labor-intensive for screening large  
94 datasets and clinical samples (22). However a lot of efforts have been made in order to increase the  
95 analytical throughput of the assay, resulting in the development of both conventional (23) and non-  
96 conventional (24, 25) high throughput SBA. We have previously demonstrated the usefulness of an  
97 high-throughput SBA method based on luminescence (L-SBA) as survival readout for several  
98 pathogens (including *S. flexneri* and *S. sonnei*, *Salmonella* Typhimurium, Enteritidis and Paratyphi  
99 A) using both animal (24) and human sera (26). The number of viable bacterial cells surviving the  
100 complement-mediated antibody dependent killing is quantified by measuring their metabolic ATP.  
101 After bacteria lysis, ATP becomes available to trigger a luciferase-mediated reaction, resulting in a  
102 measurable luminescence signal. In L-SBA the level of luminescence detected is proportional to the  
103 number of living bacteria present in the assay wells, which is inversely proportional to the level of  
104 functional antibodies present in the serum (24). Result of the assay is the IC50, the dilution of sera  
105 able to kill half of the bacteria present in the assay, thus representing the SBA titer of the sera. We  
106 have already demonstrated the possibility to use the L-SBA to determine the bactericidal activity of  
107 sera raised against *S. sonnei* GMMA in pre-clinical models (14). Here we present the further  
108 development of this method, showing its full characterisation using human sera, and in particular  
109 sera raised against *S. sonnei* GMMA based vaccine (1790GAHB) as model. We have characterised  
110 the method intralaboratory by assessing its specificity, linearity, and precision.

111 The L-SBA assay described here is a useful tool for measuring functional antibodies elicited not only  
112 by GMMA based vaccines, but in general to assess *Shigella*-specific functional antibodies *in vitro*,  
113 and potentially of all vaccines that induce antibodies capable of complement mediated killing, either  
114 from preclinical and clinical sera.

115

116 **RESULTS**

117

118 **Development and optimisation of L-SBA on human sera raised against *S. sonnei* GMMA.** In  
119 order to determine the possibility to assess serum bactericidal activity of human sera against *S.*  
120 *sonnei* by L-SBA, NVGH2863, an anti-*S. sonnei* IgG human standard serum already in use to assess  
121 quantity of human antibodies raised upon vaccination with *S. sonnei* GMMA in clinical trials (17,  
122 18), has been used to set-up the assay conditions with human sera and characterise the assay prior  
123 moving on with testing the functionality of clinical samples. Initial experiments were conducted to  
124 test the behaviour in L-SBA of NVGH2863 under experimental conditions already established with  
125 pre-clinical sera (20% exogenous baby rabbit complement (BRC) and *S. sonnei* with stabilized LPS  
126 expression *in vitro* as target bacteria). Experiments were conducted in comparison to mouse standard  
127 serum NVGH1894, already used extensively in pre-clinical studies (24), thus serving also as  
128 bridging. Assay conditions developed in pre-clinical studies resulted to be optimal also when using  
129 human sera, without detection of prozone effect when assaying sera finally diluted at 1:30 in the  
130 assay (Fig. 1A). A prozone effect is defined for a curve readout vs dilution (in this case luminescence  
131 vs serum dilution) a condition in which for the first points tested (the least diluted) the readout value  
132 (luminescence) is higher than readout value obtained with points highly diluted.

133 We did an initial assessment of the homoscedasticity of the data produced at the different sera  
134 dilutions, performing 12 independent sera dilution series repeated in 6 different plates. The test for  
135 equal variance of the data obtained per each sera dilution (per each plate) confirmed the lack of  
136 homoscedasticity of the data (Fig. S1). In the 4-Parameter Logistic (PL) fitting of luminescence  
137 versus Log transformed sera dilutions, the sum of squared residuals weighted for the inverse of  
138 luminescence<sup>2</sup> was minimized. An improved analysis method to directly obtain SBA titres from  
139 raw luminescence data was also implemented. The aim was to minimise any raw data manipulation  
140 by operator (i.e. not to normalise for the dilution giving the highest luminescence for each dilution

## characterisation L-SBA on human sera

141 series, and not to individually select this value and do calculations for each sample within each run),  
142 thus reducing at minimum risk of errors. The latter is a critical aspect when testing clinical samples  
143 to ensure integrity of the data. To further improve the analysis, we also included in the 4PL fitting the  
144 luminescence value of a well with no serum, by assigning to it an arbitrary Log dilution of 15 to  
145 mimic the luminescence obtained from a serum several billions time diluted, and thus representing  
146 the maximum growth of bacteria in the assay. The use of luminescence detected on the well with no  
147 serum, coupled with mathematically forcing the 4PL regression to have a bottom luminescence  
148 below the level detected with high bactericidal sera (400 counts per second - CPS), provided solid  
149 upper and lower asymptotes of the 4PL curve fitted to data, minimising any impact of prozone (Fig.  
150 1B).

151 With the identified assay conditions and improved analysis method we then moved to L-SBA  
152 characterisation by assessing precision (both in terms of repeatability and intermediate precision),  
153 specificity, linearity, as well as to determine limit of detection and quantitation of the assay.

154

155 **Precision.** Precision of the method expresses the closeness of agreement among multiple analyses of  
156 the same homogeneous representative sample tested under the prescribed conditions. It was  
157 considered at two levels: repeatability (intra-assay variation) and reproducibility as intermediate  
158 precision (inter-assay variation). ANOVA with variance component analysis (general linear model  
159 with random factors) was used to estimate the intermediate precision (defined as the variability  
160 among different days, different operators), the repeatability (defined as the variability under the same  
161 operating conditions over a short interval of time) and to evaluate the contributions of the operator  
162 and day of analysis to the variability. Thus, to assess precision of the assay, the IC<sub>50</sub> for NVGH2863  
163 serum was determined independently by two operators, twelve times per day, in 3 different days (72  
164 measurements in total). Log-transformed IC<sub>50</sub>s obtained by both operators on each day have been  
165 used to determine repeatability and intermediate precision of the assay (Fig. S2).

166 The analysis was characterized by an intermediate precision (CV% IP) of 6.15% and a repeatability  
167 (CV% R) of 6.15%. All the variance has been in fact attributed to the repeatability: both day and  
168 operators resulted to be not significant (p values = 0.605 and 0.625 respectively). The average  
169 LogIC<sub>50</sub> from all the measurements resulted to be 3.36 (or IC<sub>50</sub> = 2528).

170

171 **Linearity.** To assess linearity of the assay, NVGH2863 serum was pre-diluted in PBS (neat, 2-fold,  
172 4-fold, 8-fold, 16-fold and 32-fold times respectively) before being probed against *S. sonnei* in L-  
173 SBA. Each pre-dilution was prepared independently by the two operators on the same day and  
174 assayed two times. We considered the average of IC<sub>50</sub> of the undiluted serum as “true value” and  
175 from this one we calculated the expected IC<sub>50</sub> based on the dilutions by volume performed (IC<sub>50</sub>  
176 theoretical). A regression analysis was done on Log(IC<sub>50</sub> experimentally obtained) vs Log(IC<sub>50</sub>  
177 theoretical) (Fig. 2). From the analysis of variance, the linear model was significant (p < 0.001) and  
178 lack of fit not significant (p = 0.122) (Figure S3A). The residuals of the linear regression model were  
179 normally distributed (Figure S3B), the intercept was not significantly different from zero (95% CI: -  
180 1.412; 0.096), and the slope not significantly different from 1 (95% CI: 0.856; 1.400) (Figure S3A).

181

182 **Specificity.** Specificity of the assay is the ability of an analytical procedure to determine solely the  
183 concentration of the analyte that it intends to measure. In case of *S. sonnei* 1790GAHB vaccine, the  
184 target antigen is considered the LPS OAg.

185 We initially assessed the homologous specificity by pre-incubating homologous *S. sonnei* purified  
186 LPS at different concentrations with test serum prior to perform the L-SBA. The aim was to  
187 determine the lowest concentration of LPS able to inhibit  $\geq 70\%$  of the IC<sub>50</sub>. Homologous  
188 competitor was spiked to NVGH2863 at the final concentrations of 50, 20, 5, 1, 0.1  $\mu\text{g/mL}$ ; the  
189 undepleted control was represented by NVGH2863 serum incubated with an equal volume of PBS  
190 alone. All samples were assayed in duplicate. Percentage of inhibition was determined by calculating



191 the decrease in the observed SBA titer between samples pre-treated with competitor and undepleted  
192 control. The lowest *S. sonnei* LPS concentration, among the ones tested, that could cause a reduction  
193 of the IC50  $\geq 70\%$  compared to the undepleted control sample resulted to be 0.1  $\mu\text{g}/\text{mL}$  with over  
194 90% depletion of the SBA titer. This concentration was then selected to assess the heterologous  
195 specificity.

196 A second set of experiments was performed to determine the heterologous specificity. This was  
197 carried out by pre-incubating NVGH2863 serum with an equal volume of heterologous competitor at  
198 the final concentration of 0.1  $\mu\text{g}/\text{mL}$ . For heterologous specificity *S. flexneri* 1b, *S. flexneri* 2a, *S.*  
199 *flexneri* 3a OAg (heterologous but from the same species) and *Salmonella* Typhimurium OAg  
200 (heterologous from a different species) were tested; internal controls for these experiments were  
201 represented by serum preincubated with an equal volume of PBS alone (undepleted), and by serum  
202 preincubated with *S. sonnei* LPS (to further confirm homologous specificity). Specificity was  
203 determined as % IC50 inhibition; this was calculated using the following formula:

204  $(\text{IC}_{50} \text{ of the undepleted sample}) - (\text{IC}_{50} \text{ of the sample pre-treated with competitor}) / (\text{IC}_{50} \text{ of the}$   
205  $\text{undepleted sample}) * 100.$

206 Depletion with 0.1  $\mu\text{g}/\text{mL}$  of *S. sonnei* LPS (homologous competitor) caused an inhibition of IC50 of  
207 95%, confirming high specificity of the assay for *S. sonnei* LPS, whereas depletion with heterologous  
208 antigens resulted in an absent or a marginal ( $< 30\%$ ) decrease in SBA titer, suggesting the absence of  
209 any non-*S. sonnei* polysaccharide-specific response in the assay (Table 1).

210

211 **Limit of detection (LoD) and Limit of quantitation (LoQ).** Finally, we determined the LoD and  
212 LoQ of the assay, representing respectively the lowest SBA titer than can be detected under the assay  
213 conditions, and the lowest SBA titer that can be quantified with a suitable precision. To do so  
214 NVGH2863 was pre-diluted in PBS to generate a sample with low but detectable SBA titer. These  
215 conditions simulated the worst-case scenario possible for the assay, and thus the one expected to give

216 the highest variability. Twelve independent serial curves were tested and IC50 calculated as reported  
217 in Table 2.

218 Limit of detection (LoD) and limit of quantitation (LoQ) of the assay were calculated accordingly to  
219 the ICH guideline Q2(R1) (27), by applying the following formulas:

$$220 \quad \text{LoD} = 10^{(3.3 * \text{SD})} * X$$

$$221 \quad \text{LoQ} = 10^{(10 * \text{SD})} * X$$

222 where X represents the lowest serum dilution tested in the assay (in our case = 30) and SD represents  
223 the standard deviation of IC50 obtained for the samples. LoD and LoQ resulted to be equal to an  
224 IC50 of 45 and of 100 respectively.

225

## 226 **DISCUSSION**

227 The predominant readout for *Shigella* vaccine immunogenicity has been traditionally considered the  
228 serum IgG antibody level against LPS (28), that can be assessed through LPS-specific ELISA.  
229 Several assays can be considered as immunological functional readouts to determine effectiveness of  
230 antibodies raised upon vaccination, like opsonophagocytosis or serum bactericidal assay, to  
231 determine cell-mediated and cell-independent bactericidal activity of antibodies respectively (20).  
232 Although not being an established correlate of protection for *Shigella* effectiveness, ability to cause  
233 complement mediated killing has been assessed several times in sera both from convalescent patients  
234 and from vaccinated individuals (3, 4, 7). An *in vitro* assay to assess complement mediated killing  
235 represents a key indication of functional activity of antibodies raised upon vaccination with *Shigella*  
236 vaccine candidates, and this assay is traditionally represented by the SBA. The traditional SBA  
237 method used to determine the bactericidal activity of *Shigella* sera from clinical trials relies in a  
238 laborious process of plating bacteria on solid media, overnight incubation, colony counting (29), end  
239 point titer calculation without an interpolation of all sera dilutions tested (8). Such method is  
240 therefore often time consuming, highly variable, operator dependent and thus difficult to perform

characterisation L-SBA on human sera

241 with consistency (Table 3). To overcome these limitations, we have recently developed an high-  
242 throughput SBA method based on luminescence readout (L-SBA), that has been already extensively  
243 described to determine the level of functional antibodies *in vitro* (24). In this study we have  
244 presented the further optimization and characterization of L-SBA on human sera. GVGH is working  
245 on developing a multivalent vaccine against *Shigella* based on GMMA technology. The most  
246 advanced *S. sonnei* component (1790GAHB), has been tested in phase I and phase II clinical trials.  
247 Immunogenicity has been evaluated so far in terms of anti-LPS IgG response induced (17, 18) (19).  
248 The work performed here will allow the analysis of the clinical samples by SBA, confirming if the  
249 antibodies elicited by 1790GAHB are able to kill *Shigella* (i.e. functionality of antibodies induced).  
250 We have successfully optimised the fitting of the data, including in data analysis a point mimicking a  
251 sera billion times diluted, allowing to establish conditions on which, without any normalisation, SBA  
252 titers can be directly obtained from raw luminescence values. The latter represents a crucial aspect to  
253 increase the throughput of the assay, but especially to reduce any potential bias due to manipulation  
254 of raw data when testing clinical samples.

255 In this work we have characterised L-SBA on human sera, demonstrating that in the working  
256 conditions tested, it is able to detect sera having a SBA titer as little as 45, with virtually no upper  
257 limit of detection, and to quantify with precision sera with IC50 of 100. Work is currently ongoing to  
258 further reduce LoD and LoQ. The assay showed low variability, in particular the repeatability  
259 corresponded to the intermediate precision (CV% of 6.15%). Neither operator nor day of analysis  
260 resulted to be significant on the overall variability. Furthermore, L-SBA resulted to be highly specific  
261 for the key active ingredient of the vaccine candidate, as by depleting the serum with as little as 0.1  
262 µg/mL of homologous LPS, over 95% reduction of IC50 was observed, whereas no depletion was  
263 observed when depleting sera with *S. flexneri* 2a, *S. flexneri* 3a and *Salmonella* Typhimurium OAg,  
264 with only a marginal SBA titer depletion (28%) observed after incubation with *S. flexneri* 1b OAg.  
265 Linearity of the assay was also assessed resulting to be good within the tested range, with a slight

## characterisation L-SBA on human sera

266 deflection with more diluted samples, as reported for similar assays (23). In line with that, good  
267 fitting of the data was obtained with a second order exponential model (Fig.S4).

268 Using the SBA configuration described here, up to 132 specimens can be tested per day by a single  
269 operator, including also a standard serum to validate each plate (12 plates can be assayed per day per  
270 operator). The analytical throughput of the described *Shigella* SBA is superior to that of another  
271 high-throughput assay recently described by Nham et al. (23), not only in terms of number of  
272 samples that can be assayed by one operator in one day, but also in terms of not having to rely on  
273 overnight incubation of plates to enable the bacteria to grow and become colonies (Table 3). As our  
274 assay uses standard reagents and requires only a luminometer to detect ATP, L-SBA can be  
275 considered simple enough to be adopted by laboratories around the world. Although inter-laboratory  
276 variability was not evaluated in our study, in case this would be observed, results could be  
277 normalised with the use of reference serum (23).

278 In conclusion, L-SBA applied to human sera represents an assay fully suitable to perform clinical  
279 analysis in high-throughput. Due to its specificity and versatility L-SBA can be applied to determine  
280 bactericidal activity of clinical sera raised against different *Shigella* serotypes, helping the  
281 development of vaccines not only in single component but also when they are in multi-component  
282 formulations. Our L-SBA method can be easily extended to other pathogens, as the method has been  
283 already demonstrated to have similar performances against a broad range of pathogens using animal  
284 samples (24, 26).

285

## 286 **MATERIALS AND METHODS**

287

### 288 **Bacterial strains and reagents.**

289 Working aliquots of *S. sonnei virG::cat* (30), a strain with stabilized major virulence plasmid (pSS),  
290 thus resulting in a stabilized OAg expression *in vitro* when grown in presence of antibiotic, stored

## characterisation L-SBA on human sera

291 frozen at -80°C in 20% glycerol stocks, were grown overnight (16-18 hours) at 37°C in Luria Bertani  
292 (LB) medium supplemented with 20 µg/mL chloramphenicol, stirring at 180 rpm. The overnight  
293 bacterial suspension was then diluted in fresh LB medium supplemented with 20 µg/mL of  
294 chloramphenicol to an optical density at 600 nm (OD<sub>600</sub>) of 0.05 and incubated at 37°C with 180 rpm  
295 agitation in an orbital shaker, until reaching OD<sub>600</sub> of 0.22 +/- 0.02.

296 Baby (3- to 4-week-old) rabbit complement (BRC) was purchased from Cederlane, stored in 10 mL  
297 frozen aliquots, thawed at 4°C overnight when used. PBS was used for serum and bacteria dilutions.

298 LPS was extracted from *S. sonnei* by hot phenol extraction as previously reported (10), whereas OAg  
299 was extracted from *S. flexneri* 1b, 2a 3a and from *Salmonella* Typhimurium by direct acid hydrolysis  
300 as previously reported (14). All extracted polysaccharides were fully characterised in terms of sugar  
301 content, protein and nuclei acid impurities by a combination of analytical techniques, including  
302 High-Performance Liquid Size Exclusion Chromatography (31), micro BCA and absorption at 260  
303 nm as previously reported (14).

304

### 305 **Serum samples**

306 The human serum tested was an anti-human *S. sonnei* IgG standard serum (NVGH2863) that was  
307 created by pooling sera from adult subjects immunised with 1790 GAHB in non-endemic European  
308 populations (17). NVGH2863 has been already used as standard serum for *S. sonnei* LPS IgG  
309 assessment by ELISA (17-19). Frozen 50 µL working aliquots of the serum were stored at -80°C  
310 until use. In setup experiments a standard serum obtained from mice immunised with 1790GAHB  
311 (24) was also included.

312 All samples tested in SBA were previously Heat Inactivated (HI) at 56 °C for 30 min to remove  
313 endogenous complement activity.

314 Various aliquots of HI NVGH2863 serum have been used and treated as described below to  
315 determine different assay parameters.

316 *Samples to assess repeatability and intermediate precision:* each sample consists on the same  
317 HI NVGH2863 serum; 12 identical samples were assayed each day by two operators and the assay  
318 was repeated in three different days by each of the two operators independently (72 samples in total,  
319 36 per operator, 12 on each day).

320 *Samples to assess limit of detection and limit of quantitation:* HI NVGH2863 was diluted 20  
321 times v:v in PBS to generate a sample with low but detectable SBA titer (expected IC<sub>50</sub> to be around  
322 100). Twelve identical NVGH2863 prediluted serum samples were assayed on the same day by the  
323 same operator.

324 *Samples to assess linearity:* HI NVGH2863 serum was assayed neat or diluted 2, 4, 8, 16, 32-  
325 fold (v:v) with PBS prior performing the assay; samples were prepared independently by two  
326 operators on the same day, with each sample assayed twice by the same operator on the same day (4  
327 IC<sub>50</sub> obtained for each dilution, 2 IC<sub>50</sub> by each operator).

328 *Samples to assess specificity:* two sets of samples were prepared to assess homologous and  
329 heterologous specificity of the assay using HI NVGH2863 serum diluted 1:1 (v:v) in PBS alone or  
330 PBS supplemented with different quantity of homologous or heterologous purified polysaccharides.  
331 In the first experiment HI NVGH2863 serum was spiked with homologous (*S. sonnei*) purified LPS  
332 at different final concentrations (50, 20, 5, 1, 0.1 µg/mL respectively) and compared with sample  
333 spiked 1:1 with PBS alone, incubated overnight (16-18 hours) at 4°C shaking at 200 rpm in an orbital  
334 shaker prior being tested. Each spiked sample was assayed in duplicate by the same operator on the  
335 same day. The lowest concentration of LPS between the ones tested able to inhibit >70% the IC<sub>50</sub>  
336 was then used in a second experiment to determine the heterologous specificity. In the second  
337 experiment HI NVGH2863 serum diluted 1:1 (v:v) in PBS supplemented with *S. flexneri* 1b, *S.*  
338 *flexneri* 2a, *S. flexneri* 3a OAg (heterologous but from the same species) or *Salmonella* Typhimurium  
339 OAg (heterologous from a different species) was prepared and assayed in comparison to sample  
340 preincubated overnight with an equal volume of PBS alone (undepleted) and a sample preincubated

341 with *S. sonnei* LPS (to confirm homologous specificity). All samples were incubated overnight (16-  
342 18 hours) at 4°C shaking at 200 rpm in an orbital shaker prior being tested. Each spiked sample was  
343 assayed in duplicate by the same operator on the same day.

344

#### 345 **Luminescent-SBA (L-SBA)**

346 Serum bactericidal assay based on luminescent readout (L-SBA) was performed in 96-well round  
347 bottom sterile plates (Corning) – the SBA plate - by incubating different dilutions in PBS of HI test  
348 sera in presence of exogenous complement (BRC) and bacteria.

349 HI sera were serially diluted in PBS in the SBA plate (10 µL/well). The starting dilution of each  
350 serum in the assay was 1:30 (final dilution), followed by 3-fold dilution steps up to 7 dilution points,  
351 plus one control well with no sera added. Up to 12 different sera can be assayed within each SBA  
352 plate.

353 Log-phase cultures ( $OD_{600}=0.22 \pm 0.02$ ) were prepared as described above and diluted to  
354 approximately  $1 \times 10^6$  Colony Forming Unit (CFU)/mL in PBS. An adequate volume of reaction  
355 mixture containing the target bacterial cells (10 µL/well) and BRC (20 µL/well) as external source of  
356 complement in PBS medium (60 µL/well) was prepared; 90 µL/well of reaction mixture were added  
357 to each well of the SBA plate containing HI serum (final reaction volume 100 µL), mixed and  
358 incubated for 3 hours at 37°C.

359 At the end of the incubation, the SBA plate was centrifuged at room temperature for 10 min at  
360 4000×g. The supernatant was discarded to remove ATP derived from dead bacteria and SBA  
361 reagents. The remaining live bacterial pellets were resuspended in PBS, transferred in a white round-  
362 bottom 96-well plate (Greiner) and mixed 1:1 v:v with BacTiter-Glo Reagent (Promega). The  
363 reaction was incubated for 5 min at room temperature on an orbital shaker, and the luminescence  
364 signal measured by a luminometer (Synergy HT, Biotek).

365

366 **Calculations**

367 The level of luminescence detected is directly proportional to the number of living bacteria present in  
368 the wells, which is inversely proportional to the level of functional antibodies present in the serum  
369 (24).

370 A 4-parameter non-linear regression was applied to raw luminescence (no normalisation of data was  
371 applied) obtained for all the sera dilutions tested for each serum; an arbitrary serum dilution of  $10^{15}$   
372 was assigned to the well containing no sera. Fitting was performed by weighting the data for the  
373 inverse of luminescence<sup>2</sup> and constraining the curves to have a bottom between 0 and 400 CPS. 400  
374 CPS is the approximate value corresponding to the lowest luminescence detected at T180 for sera in  
375 all wells in which bacteria are killed (300 CPS) plus the SD of luminescence detected on those wells  
376 (100).

377 Results of the assay are expressed as the IC<sub>50</sub> (the dilution of sera able to kill half of the bacteria  
378 present in the assay), represented by the reciprocal serum dilution that results in a 50% reduction of  
379 luminescence (and thus raising 50% growth inhibition). GraphPad Prism 7 software (GraphPad  
380 Software, La Jolla, CA) was used for fitting and IC<sub>50</sub> determination.

381

382 **Statistical analysis**

383 Statistical analyses were performed with Minitab 18, Minitab Inc as described in results section.  
384

385 **Ethical statement**

386 The human serum pool used in this study was derived from subjects enrolled in the clinical trial  
387 registered with ClinicalTrials.gov number NCT02017899. Relevant ethics and regulatory approval  
388 was obtained from respective institutional and national ethics review committees. Written informed  
389 consent was obtained before enrollment from the subjects and the trial was designed and done in  
390 accordance with Good Clinical Practice Guidelines and the Declaration of Helsinki (17).

391





393 **CONTRIBUTIONS AND ACKNOWLEDGMENT**

394 Conceived and designed the experiments: OR, EM, AS, FMi, FN. Performed the experiments: OR;  
395 EM. Analysed the data: OR, EM, AS, CG, FMi, FN. Contributed to the writing of the manuscript:  
396 OR, EM, AS, CG, FMi, FN. This study was undertaken at the request of and sponsored by  
397 GlaxoSmithKline Biologicals SA. GSK Vaccines Institute for Global Health (Srl) (GVGH) is an  
398 affiliate of GlaxoSmithKline Biologicals SA. This work was funded in part by a grant from the Bill  
399 & Melinda Gates Foundation (OPP1133860). The funders had no role in study design, data  
400 collection and analysis, decision to publish, or preparation of the manuscript. We thank Dr Laura  
401 Bartle Martin and Dr Audino Podda for project leadership and for critically discussion about results.  
402 We would like to thank all investigators and volunteers for participation to the French study  
403 (ClinicalTrials.gov number NCT02017899).

404

405 **CONFLICT OF INTEREST**

406 All authors were employees of the GSK Vaccines Institute for Global Health at the time in which the  
407 study was conducted. GSK Vaccines Institute for Global Health Srl is an affiliate of  
408 GlaxoSmithKline Biologicals SA. AJS possess GSK shares. This does not alter the authors'  
409 adherence to all Journal policies on data and material sharing.

410

411 **FIGURE LEGENDS**

412

413 **Figure 1. 4PL fitting using different models.** Representative results obtained by **A)** Fitting  
414 performed after normalisation of luminescence raw data (counts per second - CPS) for the highest  
415 luminescence detected in sera dilutions, as per (24); **B)** Fitting directly to raw luminescence (CPS),  
416 adding a weighting factor of luminescence<sup>2</sup> in the least mean squares calculation, assigning to  
417 luminescence detected in well with no sera an arbitrary Log dilution of 15, and forcing bottom  
418 luminescence to be between 0 and 400. Within graphs IC<sub>50</sub> obtained testing NVGH1894 (mouse  
419 serum) and NVGH2863 (human serum) are reported in orange and green respectively.

420

421 **Figure 2. Linearity.** Log(IC<sub>50</sub> theoretical) obtained for each sample versus Log(IC<sub>50</sub> observed) are  
422 reported. Single datapoints are indicated with blue dots. Red solid line represents the linear  
423 regression and green dashed line the 95% confidence interval (CI).

424

425

426 **TABLES**

427

428 **Table 1. Specificity determination.** Depleted samples were spiked with with 0.1 µg/mL of  
429 homologous or heterologous purified polysaccharide; undepleted samples were spiked with PBS  
430 only.

|                          |                                         | IC <sub>50</sub> | Average IC <sub>50</sub> | % IC <sub>50</sub> inhibition |
|--------------------------|-----------------------------------------|------------------|--------------------------|-------------------------------|
| Undepleted               |                                         | 922              | 890                      | -                             |
|                          |                                         | 859              |                          |                               |
| Homologous specificity   | Depleted with <i>S. sonnei</i> LPS      | 39               | 46                       | 95                            |
|                          |                                         | 54               |                          |                               |
| Heterologous specificity | Depleted with <i>S. flexneri</i> 1b OAg | 665              | 654                      | 27                            |
|                          |                                         | 644              |                          |                               |
|                          | Depleted with <i>S. flexneri</i>        | 912              | 1253                     | 0                             |

characterisation L-SBA on human sera

|  |                                                    |      |      |          |
|--|----------------------------------------------------|------|------|----------|
|  | <b>2a OAg</b>                                      | 1594 |      |          |
|  | <b>Depleted with <i>S. flexneri</i><br/>3a OAg</b> | 1205 | 1210 | <b>0</b> |
|  |                                                    | 1215 |      |          |
|  | <b>Depleted with <i>S. Typhimurium</i> OAg</b>     | 1668 | 1605 | <b>0</b> |
|  |                                                    | 1543 |      |          |

431

432 **Table 2. Determination of Limits of detection and quantitation of the assay.** IC50 obtained in  
433 samples with low SBA titer.

| Repeat      | 1   | 2   | 3  | 4  | 5  | 6  | 7  | 8   | 9  | 10  | 11 | 12 | Average | SD  |
|-------------|-----|-----|----|----|----|----|----|-----|----|-----|----|----|---------|-----|
| <b>IC50</b> | 109 | 112 | 92 | 89 | 93 | 91 | 94 | 119 | 89 | 118 | 90 | 84 | 104     | 8.9 |

434

435 **Table 3. Evaluation of throughput between traditional and L-SBA.**

|                                | <b>L-SBA</b>                                                                                                                                                                      | <b>Traditional CFU-based SBA</b>                                             |
|--------------------------------|-----------------------------------------------------------------------------------------------------------------------------------------------------------------------------------|------------------------------------------------------------------------------|
| <b>Total time of execution</b> | 7 hours <sup>1</sup>                                                                                                                                                              | 1.5 working day <sup>2</sup>                                                 |
| <b>Data acquisition</b>        | 2 minutes/SBA plate                                                                                                                                                               | 2-3 hours/SBA plate <sup>2</sup>                                             |
| <b>Reproducibility</b>         | Higher operator independency                                                                                                                                                      | Lower operator independency                                                  |
| <b>Assay throughput</b>        | 1 operator/day: 132 individual sera in single (12 SBA plates total)                                                                                                               | 1 operator/1.5 day: 12 individual sera in single (1 SBA plate <sup>2</sup> ) |
|                                | <sup>1</sup> to execute 1 set of 12 SBA plates<br><sup>2</sup> to execute 1 SBA plate, plating each reaction well in 1 full agar plate: 1 SBA plate corresponds to 96 agar plates |                                                                              |

436

437

438

439 **REFERENCE LIST**

440

- 441 1. Collaborators GBDCoD. 2018. Global, regional, and national age-sex-specific mortality for 282 causes  
442 of death in 195 countries and territories, 1980-2017: a systematic analysis for the Global Burden of  
443 Disease Study 2017. *Lancet* 392:1736-1788.
- 444 2. Kotloff KL, Riddle MS, Platts-Mills JA, Pavlinac P, Zaidi AKM. 2018. Shigellosis. *Lancet* 391:801-812.
- 445 3. Cohen D, Block C, Green MS, Lowell G, Ofek I. 1989. Immunoglobulin M, A, and G antibody response  
446 to lipopolysaccharide O antigen in symptomatic and asymptomatic *Shigella* infections. *J Clin*  
447 *Microbiol* 27:162-7.
- 448 4. Cohen D, Green MS, Block C, Rouach T, Ofek I. 1988. Serum antibodies to lipopolysaccharide and  
449 natural immunity to shigellosis in an Israeli military population. *J Infect Dis* 157:1068-71.
- 450 5. Anderson M, Sansonetti PJ, Marteyn BS. 2016. *Shigella* Diversity and Changing Landscape: Insights  
451 for the Twenty-First Century. *Front Cell Infect Microbiol* 6:45.
- 452 6. Frenck RW, Jr., Baqar S, Alexander W, Dickey M, McNeal M, El-Khorazaty J, Baughman H, Hoepfer A,  
453 Barnoy S, Suvarnapunya AE, Kaminski RW, Venkatesan MM. 2018. A Phase I trial to evaluate the  
454 safety and immunogenicity of WRSs2 and WRSs3; two live oral candidate vaccines against *Shigella*  
455 *sonnei*. *Vaccine* 36:4880-4889.
- 456 7. Cohen D, Ashkenazi S, Green M, Lerman Y, Slepon R, Robin G, Orr N, Taylor DN, Sadoff JC, Chu C,  
457 Shiloach J, Schneerson R, Robbins JB. 1996. Safety and immunogenicity of investigational *Shigella*  
458 conjugate vaccines in Israeli volunteers. *Infect Immun* 64:4074-7.
- 459 8. Riddle MS, Kaminski RW, Di Paolo C, Porter CK, Gutierrez RL, Clarkson KA, Weerts HE, Duplessis C,  
460 Castellano A, Alaimo C, Paolino K, Gormley R, Gambillara Fonck V. 2016. Safety and Immunogenicity  
461 of a Candidate Bioconjugate Vaccine against *Shigella flexneri* 2a Administered to Healthy Adults: a  
462 Single-Blind, Randomized Phase I Study. *Clin Vaccine Immunol* 23:908-917.
- 463 9. van der Put RM, Kim TH, Guerreiro C, Thouron F, Hoogerhout P, Sansonetti PJ, Westdijk J, Stork M,  
464 Phalipon A, Mulard LA. 2016. A Synthetic Carbohydrate Conjugate Vaccine Candidate against  
465 Shigellosis: Improved Bioconjugation and Impact of Alum on Immunogenicity. *Bioconjug Chem*  
466 27:883-92.
- 467 10. Gerke C, Colucci AM, Giannelli C, Sanzone S, Vitali CG, Sollai L, Rossi O, Martin LB, Auerbach J, Di  
468 Cioccio V, Saul A. 2015. Production of a *Shigella sonnei* Vaccine Based on Generalized Modules for  
469 Membrane Antigens (GMMA), 1790GAHB. *PLoS One* 10:e0134478.
- 470 11. Rossi O, Caboni M, Negrea A, Necchi F, Alfini R, Micoli F, Saul A, MacLennan CA, Rondini S, Gerke C.  
471 2016. Toll-Like Receptor Activation by Generalized Modules for Membrane Antigens from Lipid A  
472 Mutants of *Salmonella enterica* Serovars Typhimurium and Enteritidis. *Clin Vaccine Immunol* 23:304-  
473 14.
- 474 12. Rossi O, Pesce I, Giannelli C, Aprea S, Caboni M, Citiulo F, Valentini S, Ferlenghi I, MacLennan CA,  
475 D'Oro U, Saul A, Gerke C. 2014. Modulation of endotoxicity of *Shigella* generalized modules for  
476 membrane antigens (GMMA) by genetic lipid A modifications: relative activation of TLR4 and TLR2  
477 pathways in different mutants. *J Biol Chem* 289:24922-35.
- 478 13. Berlanda Scorza F, Colucci AM, Maggiore L, Sanzone S, Rossi O, Ferlenghi I, Pesce I, Caboni M, Norais  
479 N, Di Cioccio V, Saul A, Gerke C. 2012. High yield production process for *Shigella* outer membrane  
480 particles. *PLoS One* 7:e35616.
- 481 14. De Benedetto G, Alfini R, Cescutti P, Caboni M, Lanzilao L, Necchi F, Saul A, MacLennan CA, Rondini S,  
482 Micoli F. 2017. Characterization of O-antigen delivered by Generalized Modules for Membrane  
483 Antigens (GMMA) vaccine candidates against nontyphoidal *Salmonella*. *Vaccine* 35:419-426.

- 484 15. Koeberling O, Ispasanie E, Hauser J, Rossi O, Pluschke G, Caugant DA, Saul A, MacLennan CA. 2014. A  
485 broadly-protective vaccine against meningococcal disease in sub-Saharan Africa based on  
486 generalized modules for membrane antigens (GMMA). *Vaccine* 32:2688-95.
- 487 16. Micoli F, Rondini S, Alfini R, Lanzilao L, Necchi F, Negrea A, Rossi O, Brandt C, Clare S, Mastroeni P,  
488 Rappuoli R, Saul A, MacLennan CA. 2018. Comparative immunogenicity and efficacy of equivalent  
489 outer membrane vesicle and glycoconjugate vaccines against nontyphoidal *Salmonella*. *Proc Natl  
490 Acad Sci U S A* 115:10428-10433.
- 491 17. Launay O, Lewis DJM, Anemona A, Loulergue P, Leahy J, Scire AS, Maugard A, Marchetti E, Zancan S,  
492 Huo Z, Rondini S, Marhaba R, Finco O, Martin LB, Auerbach J, Cohen D, Saul A, Gerke C, Podda A.  
493 2017. Safety Profile and Immunologic Responses of a Novel Vaccine Against *Shigella sonnei*  
494 Administered Intramuscularly, Intradermally and Intranasally: Results From Two Parallel Randomized  
495 Phase 1 Clinical Studies in Healthy Adult Volunteers in Europe. *EBioMedicine* 22:164-172.
- 496 18. Obiero CW, Ndiaye AGW, Scire AS, Kaunyangi BM, Marchetti E, Gone AM, Schutte LD, Riccucci D,  
497 Auerbach J, Saul A, Martin LB, Bejon P, Njuguna P, Podda A. 2017. A Phase 2a Randomized Study to  
498 Evaluate the Safety and Immunogenicity of the 1790GAHB Generalized Modules for Membrane  
499 Antigen Vaccine against *Shigella sonnei* Administered Intramuscularly to Adults from a Shigellosis-  
500 Endemic Country. *Front Immunol* 8:1884.
- 501 19. Launay O, Ndiaye AGW, Conti V, Loulergue P, Scire AS, Landre AM, Ferruzzi P, Nedjaai N, Schutte LD,  
502 Auerbach J, Marchetti E, Saul A, Martin LB, Podda A. 2019. Booster Vaccination With GVGH *Shigella*  
503 *sonnei* 1790GAHB GMMA Vaccine Compared to Single Vaccination in Unvaccinated Healthy  
504 European Adults: Results From a Phase 1 Clinical Trial. *Front Immunol* 10:335.
- 505 20. Ndungo E, Pasetti MF. 2019. Functional antibodies as immunological endpoints to evaluate  
506 protective immunity against *Shigella*. *Hum Vaccin Immunother*  
507 doi:10.1080/21645515.2019.1640427:1-9.
- 508 21. Son MS, Taylor RK. 2011. Vibriocidal assays to determine the antibody titer of patient sera samples.  
509 *Curr Protoc Microbiol* Chapter 6:Unit6A 3.
- 510 22. Borrow R, Carlone GM, Rosenstein N, Blake M, Feavers I, Martin D, Zollinger W, Robbins J, Aaberge I,  
511 Granoff DM, Miller E, Plikaytis B, van Alphen L, Poolman J, Rappuoli R, Danzig L, Hackell J, Danve B,  
512 Caulfield M, Lambert S, Stephens D. 2006. *Neisseria meningitidis* group B correlates of protection  
513 and assay standardization--international meeting report Emory University, Atlanta, Georgia, United  
514 States, 16-17 March 2005. *Vaccine* 24:5093-107.
- 515 23. Nahm MH, Yu J, Weerts HP, Wenzel H, Tamilselvi CS, Chandrasekaran L, Pasetti MF, Mani S, Kaminski  
516 RW. 2018. Development, Interlaboratory Evaluations, and Application of a Simple, High-Throughput  
517 *Shigella* Serum Bactericidal Assay. *mSphere* 3.
- 518 24. Necchi F, Saul A, Rondini S. 2017. Development of a high-throughput method to evaluate serum  
519 bactericidal activity using bacterial ATP measurement as survival readout. *PLoS One* 12:e0172163.
- 520 25. Mak PA, Santos GF, Masterman KA, Janes J, Wacknov B, Vienken K, Giuliani M, Herman AE, Cooke M,  
521 Mbow ML, Donnelly J. 2011. Development of an automated, high-throughput bactericidal assay that  
522 measures cellular respiration as a survival readout for *Neisseria meningitidis*. *Clin Vaccine Immunol*  
523 18:1252-60.
- 524 26. Necchi F, Saul A, Rondini S. 2018. Setup of luminescence-based serum bactericidal assay against  
525 *Salmonella Paratyphi A*. *J Immunol Methods* 461:117-121.
- 526 27. ICH. 1995. ICH Q2(R1) Validation of Analytical Procedures: Text and Methodology. ICH,  
527 [https://www.ich.org/fileadmin/Public\\_Web\\_Site/ICH\\_Products/Guidelines/Quality/Q2\\_R1/Step4/Q2  
528 R1\\_Guideline.pdf](https://www.ich.org/fileadmin/Public_Web_Site/ICH_Products/Guidelines/Quality/Q2_R1/Step4/Q2_R1_Guideline.pdf).
- 529 28. Cohen D, Meron-Sudai S, Bialik A, Asato V, Goren S, Ariel-Cohen O, Reizis A, Hochberg A, Ashkenazi S.  
530 2019. Serum IgG antibodies to *Shigella* lipopolysaccharide antigens - a correlate of protection against  
531 shigellosis. *Hum Vaccin Immunother* 15:1401-1408.
- 532 29. Shimanovich AA, Buskirk AD, Heine SJ, Blackwelder WC, Wahid R, Kotloff KL, Pasetti MF. 2017.  
533 Functional and Antigen-Specific Serum Antibody Levels as Correlates of Protection against Shigellosis  
534 in a Controlled Human Challenge Study. *Clin Vaccine Immunol* 24.

characterisation L-SBA on human sera

- 535 30. Caboni M, Pedron T, Rossi O, Goulding D, Pickard D, Citiulo F, MacLennan CA, Dougan G, Thomson  
536 NR, Saul A, Sansonetti PJ, Gerke C. 2015. An O antigen capsule modulates bacterial pathogenesis in  
537 *Shigella sonnei*. *PLoS Pathog* 11:e1004749.
- 538 31. Micoli F, Rondini S, Gavini M, Pisoni I, Lanzilao L, Colucci AM, Giannelli C, Pippi F, Sollai L, Pinto V,  
539 Berti F, MacLennan CA, Martin LB, Saul A. 2013. A scalable method for O-antigen purification applied  
540 to various *Salmonella* serovars. *Anal Biochem* 434:136-45.

541

542

543

544 **SUPPLEMENTARY MATERIAL**

545 **Figure S1. Test for equal variances for homoscedasticity.** Variances (x axis) from 12 replicates  
546 versus Log sera dilutions (y axis) were plotted for each of 6 different plates tested.

547

548 **Figure S2.** ANOVA with variance component analysis obtained from the 72 individual LogIC50  
549 produced by two operators in 3 different days, each day assaying independently twelve times the  
550 same sera.

551

552 **Figure S3. A)** Regression analysis for linearity assessment. **B)** Residual plots for LogIC50.

553

554 **Figure S4. Linearity.** Log(IC50 theoretical) obtained for each sample versus Log(IC50 observed)  
555 are reported. Single datapoints are indicated with blue dots. Red solid line represents second order  
556 exponential regression and green dashed line the 95% confidence interval (CI).

557

558



**Fig. 1**

**A)** Normalised to highest luminescence detected at T180

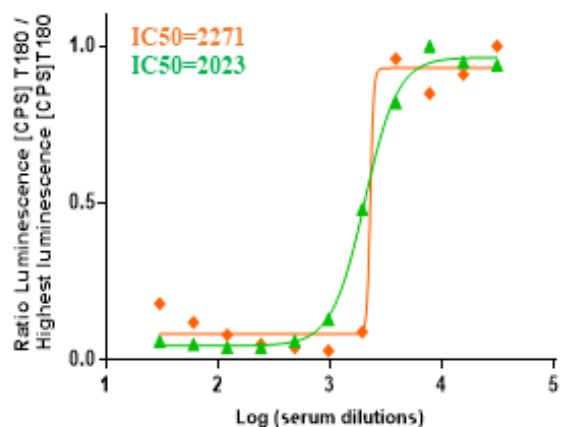

**B)** 4PL fitting directly on raw data, weighting for  $1/Y^2$

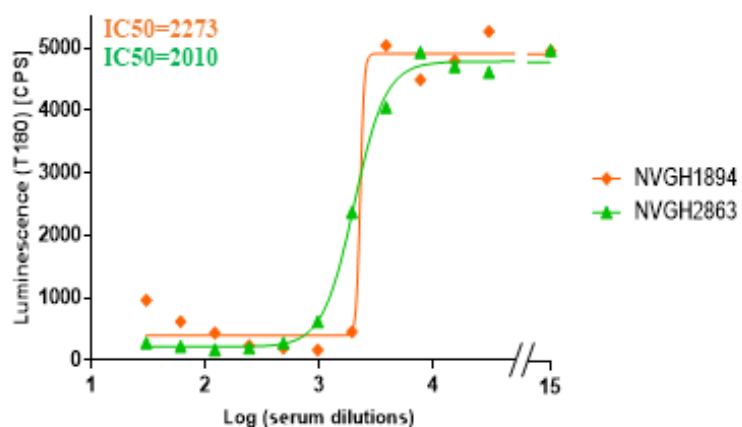

**Fig. 2**

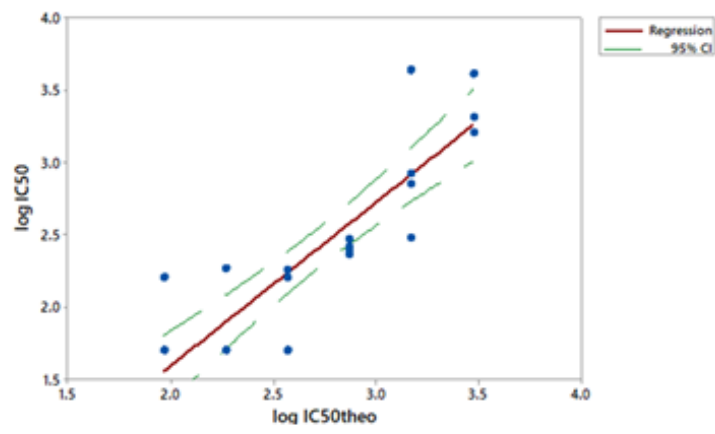

Source: https://www.biorxiv.org/content/biorxiv/early/2020/04/05/2020.04.03.024950.full.pdf
